# Supplementary material
Source: PubMed Central journal article supplement (PMC11072509)

# Supplementary Figure 3

**A**

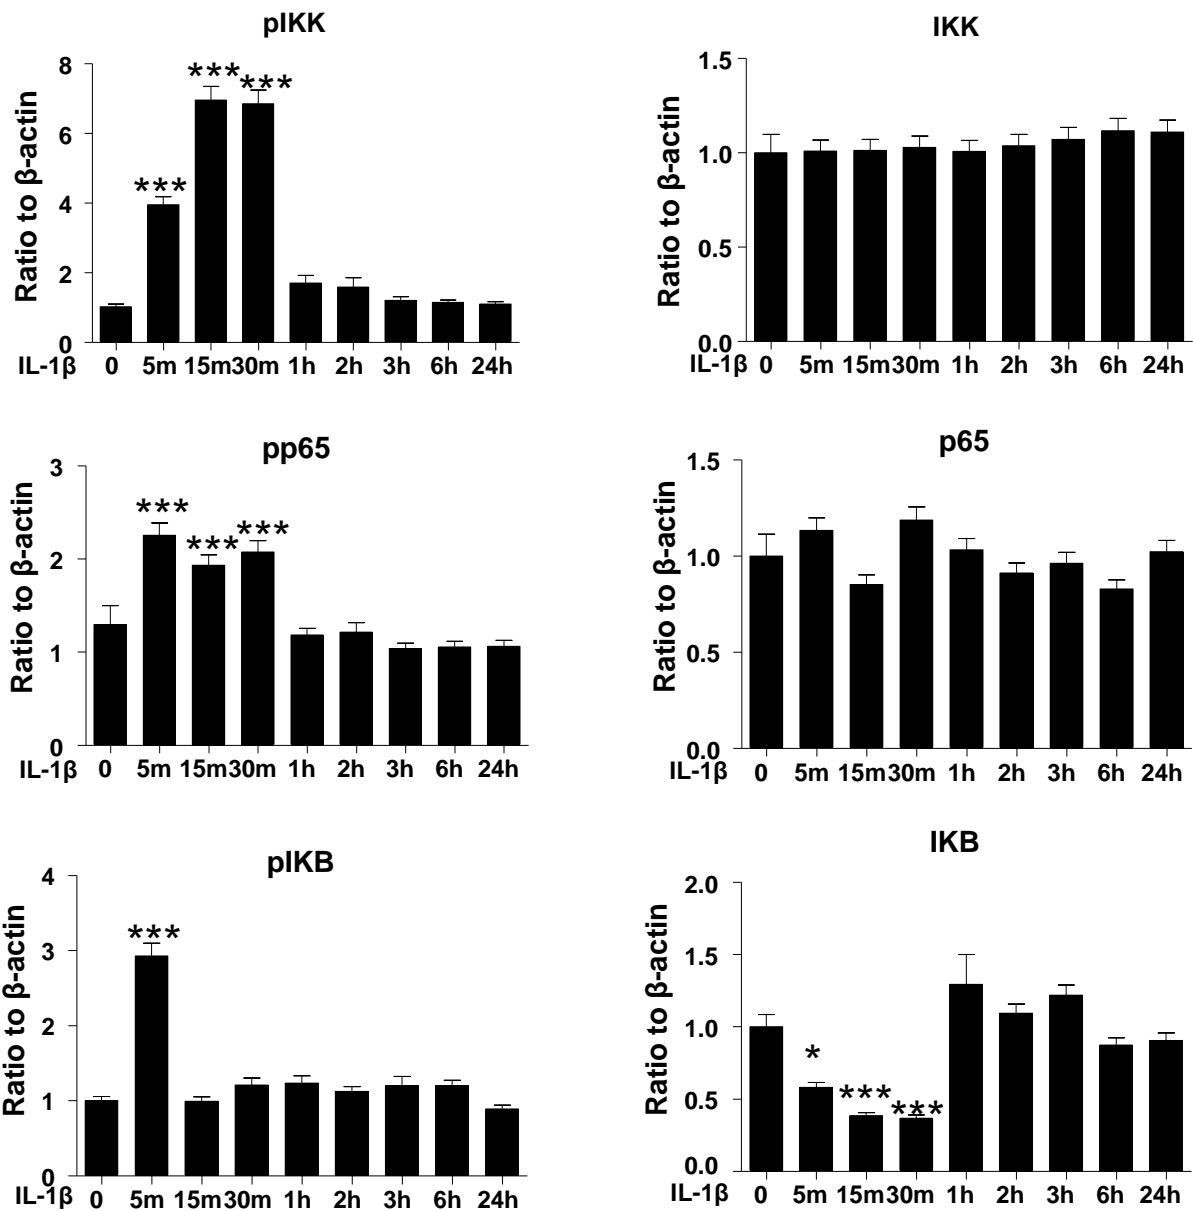

**B**

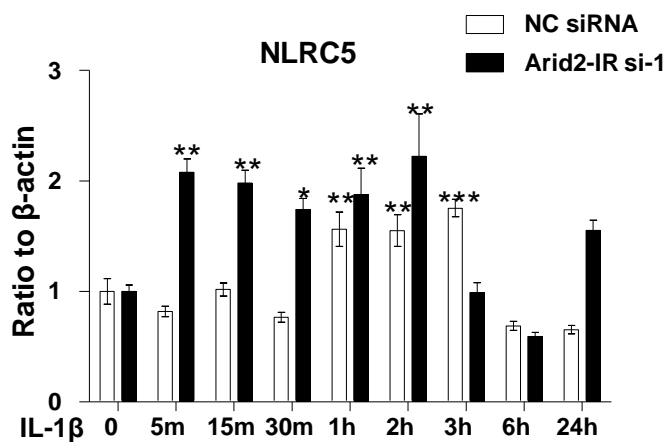

**C**

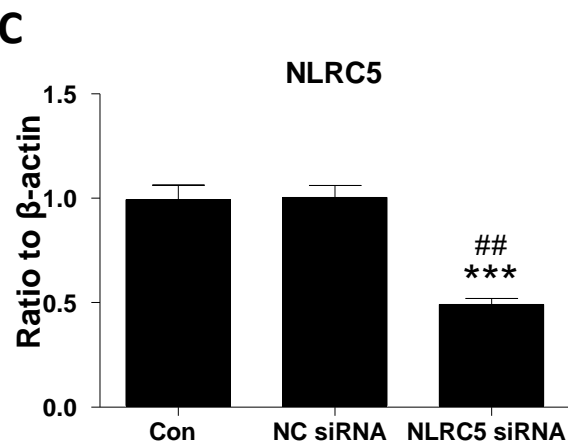

D

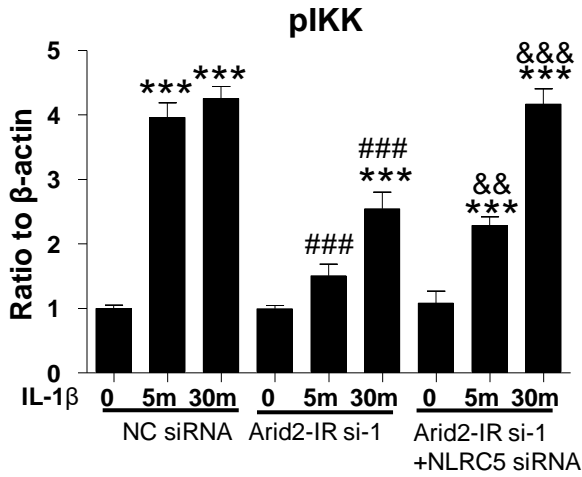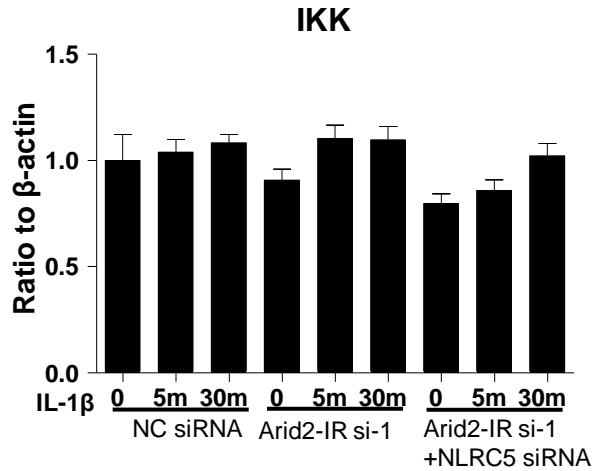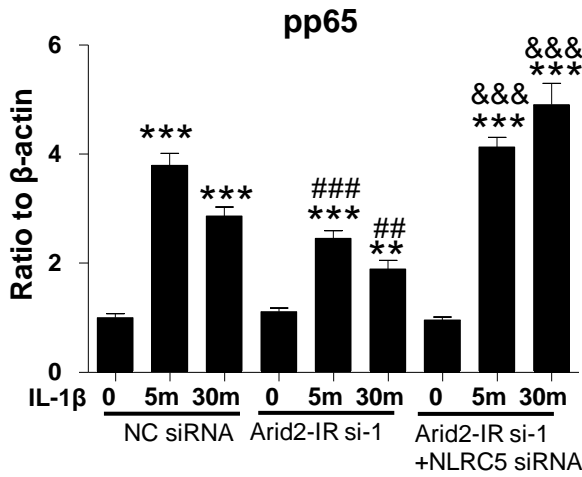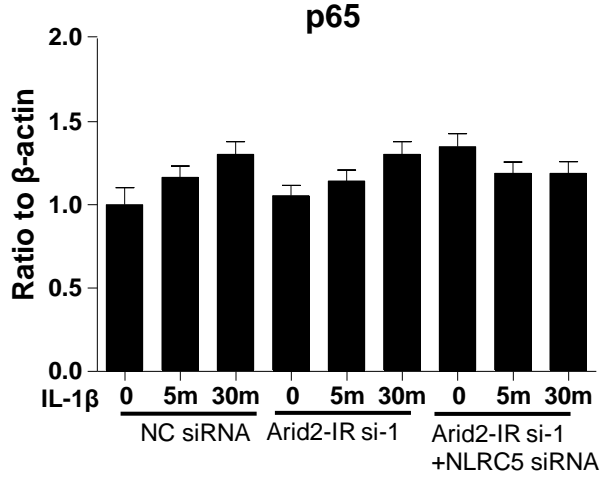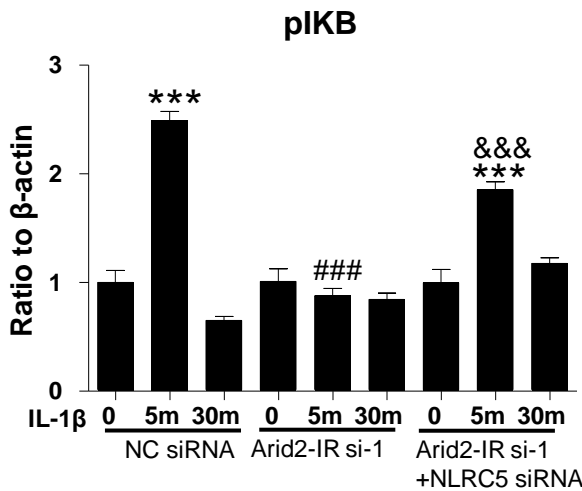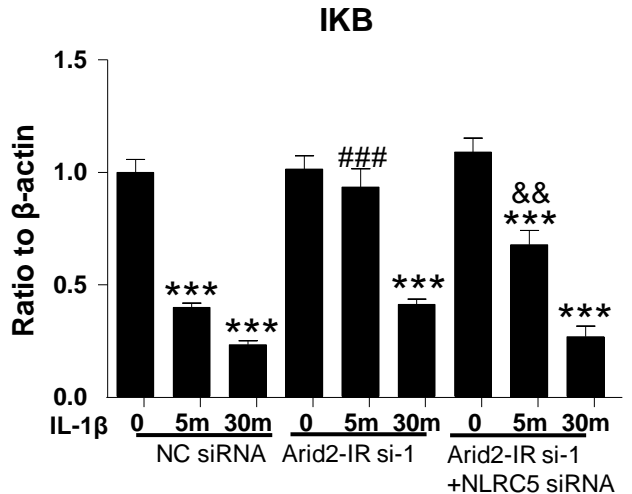

Supplement: 18_2020_3659_MOESM13_ESM.pdf [file 18_2020_3659_MOESM13_ESM.pdf]
